# Supplementary material for: Conserved Omp85 lid-lock structure and substrate recognition in FhaC
Source: PubMed Central journal article supplement (PMC4490367; doi:10.1038/ncomms8452), 2015-06-10
Supplement: ncomms8452-s1.pdf [file ncomms8452-s1.pdf]

Supplementary Material for

# Conserved Omp85 lid lock structure and substrate recognition in FhaC

Timm Maier<sup>1#</sup>, Bernard Clantin<sup>2,3#</sup>, Fabian Gruss<sup>1</sup>, Frédérique Dewitte<sup>2,3</sup>, Anne-Sophie Delattre<sup>3,4,5,6</sup>, Françoise Jacob-Dubuisson<sup>3,4,5,6</sup>, Sebastian Hiller<sup>1</sup>, Vincent Villeret<sup>2,3</sup>

# These authors contributed equally

<sup>1</sup> Biozentrum, University of Basel, Klingelbergstr. 70, 4056 Basel, Switzerland

<sup>2</sup> CNRS UMR8576, Unité Glycobiologie Structurale et Fonctionnelle, Villeneuve d'Ascq 59658, France

<sup>3</sup> Univ. Lille Nord de France, Lille 59044, France

<sup>4</sup> Institut Pasteur de Lille, Center for Infection and Immunity, Lille 59019, France

<sup>5</sup> CNRS UMR8204, Lille 59021, France

<sup>6</sup> INSERM U1019, Lille 59045, France

Correspondance should be addressed to:

Timm Maier (timm.maier@unibas.ch), Sebastian Hiller (Sebastian.hiller@unibas.ch), Vincent Villeret (vincent.villeret@univ-lille1.fr)

**This file includes:**

Supplementary Figures 1-4

Supplementary Table 1

Supplementary References 1-3

## Supplementary Figures

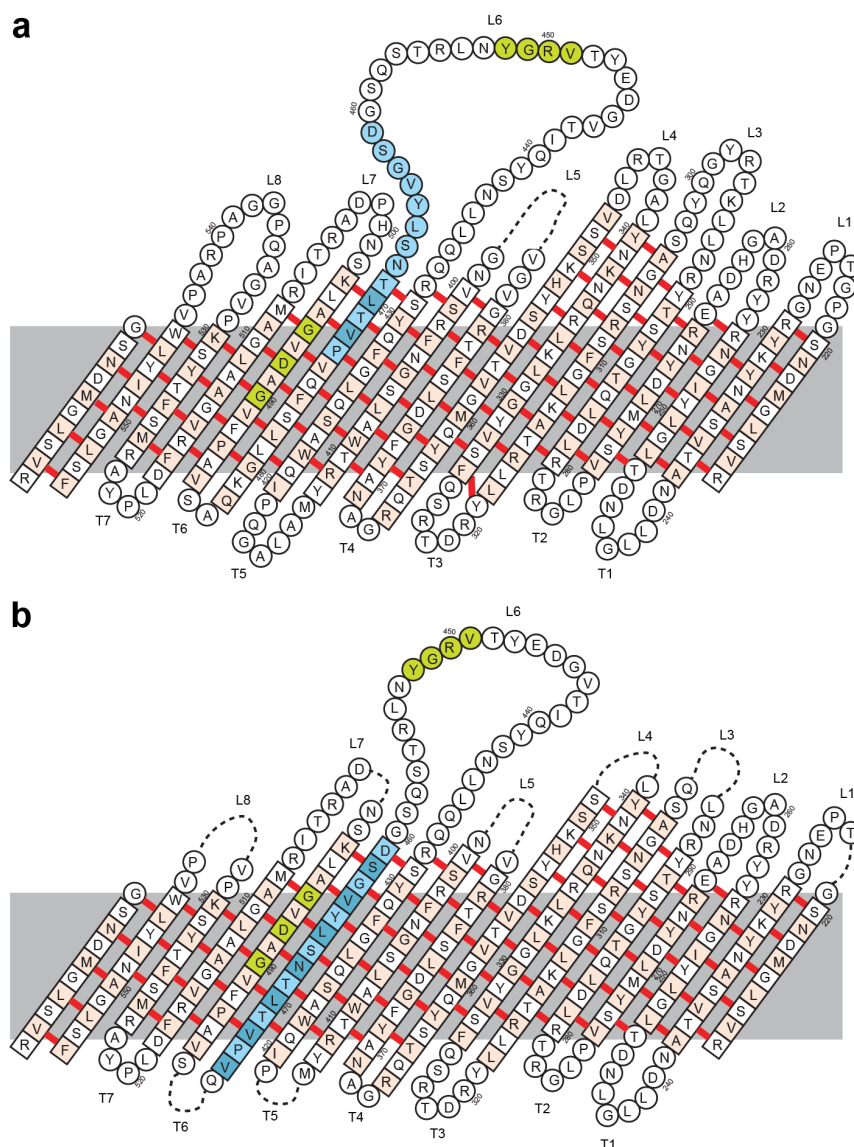

**Supplementary Figure 1. Comparison of  $\beta$ -strand topologies in models of FhaC.** 2D topology representations of (a) the superseded wtFhaC<sub>old</sub> structure (PDB entry 2QDZ<sup>1</sup>) and (b) the structures of FhaC<sub>DIS</sub> (PDB entry 4QL0; this work) and wtFhaC<sub>new</sub> (PDB entry 4QKY; this work) as viewed from the barrel exterior. Residues forming  $\beta$ -strands are indicated by rectangles, residues of loops and turns by circles. The side chains of orange residues point towards the membrane. The extracellular loops are numbered L1 to L8 from N- to C-terminus, the periplasmic turns are numbered T1 to T7. Interstrand backbone hydrogen bond pairs are indicated by red lines between the corresponding residues. Strand 1 is repeated on the left hand side to show the hydrogen bonds that form to strand 16. The conserved motifs (I/V)RG(Y/F) (residues 449–452) and GxDxG (residues 490–494) are highlighted green. Residues of strand 12 are highlighted blue to show the register shift that appeared in the superseded wtFhaC<sub>old</sub> structure<sup>1</sup> due to wrong tracing of the L6 loop.

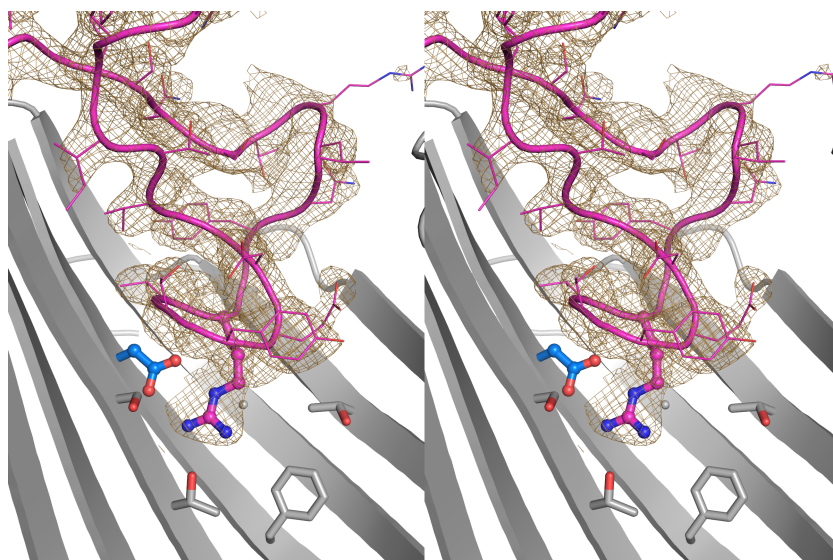

**Supplementary Figure 2. Stereo view of electron density around the L6 loop of FhaC<sub>DIS</sub>.** The 2FoFc map for FhaC<sub>DIS</sub> is shown in a radius of 2 Å around atoms belonging to the L6 loop (magenta) at 1σ contour level. Side chains of the L6 loop are shown as lines, selected side chains of the barrel (grey) are shown as sticks, and highly conserved residues as ball-and-stick.

B. pertussis FhaC (AAB30624.1)

- TpsB (WP\_005764711.1)
- TpsB (YP\_003741556.1)
- TpsB (YP\_00646915.1)
- TpsB (YP\_004122309.1)
- TpsB (WP\_008291755.1)
- TpsB (WP\_005980414.1)
- TpsB (YP\_003307097.1)
- TpsB (YP\_335961.1)
- TpsB (WP\_002831157.1)
- TpsB (WP\_004649222.1)

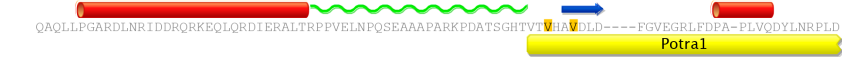

QAQLLPGARDLNRIDDRQRKEQLQRDIRALTRPPVELNPQSEAAAPARKPDATSGLTVTVAHVDLDD---FGVEGLFPDPA-PLVDLYLNRLD

AITYNEANPLTQELLRLKHKERFESVDKNEFEAKQLFLENQKLEEKATLPDLSVATNQVTKSFTID----LADESVKLNF-DQVIKAYQGLPLS  
ASLAERDIDQFLREQNVTESQDAIEDEKQIQSAQENRQQTANDRVADKNAGPKYLKSEVTVN---DDLFAFSKERN-QIISSYQKTKMG  
ASLNPADNRD IQQRQAEV DQSRQORDALLQLNQPTTTINPNGRSDAGHCFEFTKDITTYH---NSSLLREKDKN-RLNKDYINRCLN  
APVDDA IQQQNQIQQQEQRRLLDLERQRHEEMDKPPSGEDLRLPEMPPKAA PDAPCFSTAHSELS---GATLLSRRAIN-QLIAPYLGLCLT  
ASTSDQINRANQEADRIQQRRQRR I EQDRLEFERSRPKSNIETISPLDKKAADETECRDVTITTYE---GAPLLPDSQRO-PLNHFFLNCTMS  
NQQELNRERRRQAEERKLEKSEIKDEVKLNDEEDIQAMGSETRDFEIE---ENTILKKNQIE-PLKKRYI GK-KG  
GDI IERNNAE IENERRQQLERQKELEERENFGKEPQI IDGTGEVDTVSRFFTRKLEVDQ---EYNLLSKAEIK-AVIKLYLNRLKLS  
MLAGRSPASAFPGTVQDRERDLGEKARRQMI EQHRRGHAAEPAAGLPAPVQAPLGGARFPTQTEVR---GGA-RHSREI D-RIVERYRATMG  
DDSAKTINLIDKRRQQQLHI QKEFDELEKQQQE KDVYLENQDSEDKIYIFKQTFKK---NDDL- --TMQAN-NILKYYINQPLS  
ATPEI ELANKENERIQNLDRLRYEREQLLQSSKAPSRIEIAPPEKNI EKGPCLNITATHVE---GTAVIAQHEIQ-KVTQPYENS CID

E. coli TamA (P0ADE4.1)

- TamA (WP\_010374432.1)
- TamA (YP\_006917734.1)
- TamA (YP\_005377879.1)
- TamA (WP\_006914415.1)
- TamA (WP\_006956461.1)
- TamA (WP\_007639592.1)
- TamA (YP\_006416500.1)
- TamA (YP\_007468392.1)
- TamA (WP\_008316497.1)
- TamA (YP\_006721763.1)

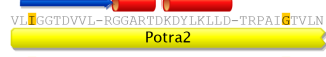

VIISGGTVVVL-RGGARTDKDYKLLD-TRPATITVVLN

VRMRTSHIS I-TGWAEQDRYLQDQLKQFEPREKQVFS  
VLWRNIDVQLDQPPALDESVLMLVQPPPLPAGLI  
VLEQVQATL-PASAREVPAVRSRLRALRALKQLD  
TKTALNLGV-RPGDDELAIEIRALRASKLATKRLI  
VRAPVNWKL-KGAEDEDDVFRSFLVSSPLKQAVFE  
ILYTELRIE I-LGEGSQDSIFQSLYDKPGIKLNRNL  
IKGSYTYQV-TGEGADNPGF---KPEFPMRVDVLL  
VVITGRDVQV-FGEGMHPALQOSIKDYLKRAKTLI  
IKNDLIFEL-EGEGRRKFKTI IQESDLRLGAPLN  
VIISYQVTL-AGAGSANKTLTGLAQFLHITDLLV

H. ducreyi BamA (4K3C\_A)

- BamA (YP\_002998039.1)
- BamA (YP\_001121414.1)
- BamA (WP\_003783125.1)
- BamA (YP\_001219350.1)
- BamA (WP\_010501263.1)
- BamA (YP\_865762.1)
- BamA (YP\_007459313.1)
- BamA (YP\_004865655.1)
- BamA (YP\_002549812.1)
- BamA (WP\_008996841.1)

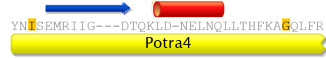

YNSEMRIIG---DTQKLD-NELNQLLTHFKAQLFR

YKLSGVVSG---NLAGHS-AEIE-QLTKIEPELYN  
YKGSVSLTG---KFI-L-PKSELE-SLVKIKQEVFS  
YYWGNVLSG---DLKDVPAASVQRHLSAIRIKLSN  
YKGSVKTFT---NLLSHPIEKLK-LKLSFNKNDIFN  
YRQKMDVRS---NVRHVTPMVR-PKIQLEFKHQIYD  
YKFGKTTISG---DFDELPEAKLY-EALKIYEBWFS  
YKINQLQIG---NINGLD-KEIR-NLINIKTDTFS  
YKSMVTIDA---NLRDFNEALV-PLTFKPDWYN  
YKESDLNVES---SVEGVDTELK-GLVTTSPGVYS  
YKFGYKVES---QLRDFDGEKMA-KTLPMKKDWYN

B. pertussis FhaC (AAB30624.1)

- TpsB (WP\_005764711.1)
- TpsB (YP\_003741556.1)
- TpsB (YP\_00646915.1)
- TpsB (YP\_004122309.1)
- TpsB (WP\_008291755.1)
- TpsB (WP\_005980414.1)
- TpsB (YP\_003307097.1)
- TpsB (YP\_335961.1)
- TpsB (WP\_002831157.1)
- TpsB (WP\_004649222.1)

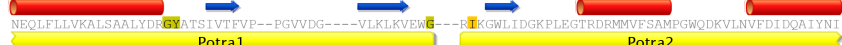

NEQLFLLVKALSALYDRGYSATSVTFVFP--PGVVDG---VLKLVKEV---RKGWLDGKPLEGRDMMVFASMPGWQDKVIVNFDIQAIYNI

TKVVFQVLKLESEVLYRAGVTS AIGLN--SKIQSG---DLEFIVLW---KVNGLVDGESAKTFKDKAMV-SVLPNLIKLSLIIYVDQVMET  
RADIIKLIRELTFYIGKYSSTSLVSLER--TNLNSG---LKLTVLW---KLSRITINGKSDYGRDRLQLFAAVPVAQDGKLNIQELDQLENM  
VNDINQLIHDSVNWYIERGYITSRAFIAE--QDLSGG---VLDQIDLE---RLESINLNQST---WALKQVFPGLIEKLNLRDIKQGMEO  
FNDANNLRDITNAYIDKGVTTTRAAIPE--QDFSGN---KLVILVVE---RSESFEFKDQGR---IRELKAAPLITIDPLNLRDIKQGLDQ  
VTDIELLAEVTKFYIDHGYITTRAYIEP--QSLASG---TLKIIVIE---KTEKLMINDNTLG--ARNINLATALPASSDVNLNRRDQAD  
GKSLINLMELENLYLEEGLSVRVKIDMEKSNIPDG---RIFLKVIE---HVFTRFKDENO---DKLIFTSPFISROILNINDLDDQSDI  
SKDINKLMTLENKYIEKGYITTRVRLEDE-TQNLSEG---TIRLITLE---TEGASLNENTF---DRMKVMSVPMKKNRILRLDQKQATDQ  
QAEIFALLRDLNMFYRGGYITTVGLAE--QNLSSG---KLVVVVHW---YKQWRVNGKAPEGRMRERLMLSSAMPGLIESVLNIDHDIDQAIEN  
VNDIYNMIKELTNFIVAKGYSSTSSVTIDE--LDQERD---ILFDLKY---FVDFVYINGDNNT---TRLDFGMLPKKDKFNIDYDLDTGIEN  
AKRIIEIMGLTALYLSNGYSAAARFYLPE--ODLKTG---TLKLVRVE---KLSQLQTERAKGT---MSLRTAIIGAEKPLNLRDLDEQALDQI

E. coli TamA (P0ADE4.1)

- TamA (WP\_010374432.1)
- TamA (YP\_006917734.1)
- TamA (YP\_005377879.1)
- TamA (WP\_006914415.1)
- TamA (WP\_006956461.1)
- TamA (WP\_007639592.1)
- TamA (YP\_006416500.1)
- TamA (YP\_007468392.1)
- TamA (WP\_008316497.1)
- TamA (YP\_006721763.1)

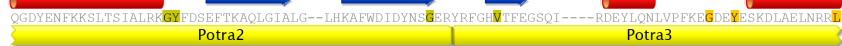

QQDYENFKKSLTSIALRRGYDFSEFTRAQGLIAG--LHRAFWIDYNSGERYRFHVTPEGSQI---RDEYLQNLVPPKEDFVESKDLAEINRR

HPQYEASKVRI TRRLAERGVFADFTKRRVAI TRA--EHAADI LNWDSGRRYDMKTRFDYDYF---RDGLFDPVYWEESYHEGKLDRIRES  
HKDYDNKASLLDSVKAQGVWRASFAQAEALHPD--DLAADAHHLIQIPRYQGQGFNESPVPF---DQDLLHRLTGQVEERTADALQDIYAQ  
DCNYESARDVTTSALTANGVLDKADLTHRVEYDTR--NRQRVELAWNIIPRYRGGVDESGSQF---RPGVLDRYVFPFAFAVYDQQLLQIQOOS  
HSQYATKNALYTAAYEAGVLDARESQAARRVDPD--NNTAAIDLVIDERYEFGVTFDQDWL---NDDFVRRVFPFAEADAEARLWLDQLHL  
TAMAPVEIKTQLLSLAQNGVDAEWKANKVRVDIE--NTAVIDAIFSSERYHFGLIENSEYI----SEDLQRYPRFEKSEANSTSSLDLQVNL  
HGRVETLAKRFSSLASLHGVFADAEKQSQVSNVA--EKSVAIVLVYDKRYF--EINLQHSIL---DEDLQRYNINIKFDYDDELELEKLVY  
HSYVEKADLRYTASQEGVLDQALLRHQVLDVPV--AYDARIEHLDTPQYR--SKYRFQDQL---DEDLRRLRYVKKFPAVYDPPDLLGLGQR  
HAHEYAAKNTFMNIAFSNGVPKARFITSWLVLDL--SNWAKTLHLMDTPLYFGNITFLQDF---NPDLLTKYITMELTYSYALLESFOON  
QVSYEKMNLYNRAISNGVFEVDFPVHQIIVNLD--TYKSLVHLAMDTRRYHFEVTFPQSDYF---SEDLRRLRYVMNMETSDTRTLELQOOL  
QNYVEEAKGLVRSKALAGVLDAAFTHEIRISPD--RTKADIRLVLDTGLYRFGVTTITGAPRY---PDEFRLRYVTIKFRPSSYARLGETQNF

H. ducreyi BamA (4K3C\_A)

- BamA (YP\_002998039.1)
- BamA (YP\_001121414.1)
- BamA (WP\_003783125.1)
- BamA (YP\_001219350.1)
- BamA (WP\_010501263.1)
- BamA (YP\_865762.1)
- BamA (YP\_007459313.1)
- BamA (YP\_004865655.1)
- BamA (YP\_002549812.1)
- BamA (WP\_008996841.1)

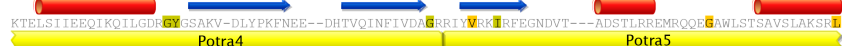

KTELSIIEEQIKQLGDREYGSAKV-DLYPKFNEE--DHTVQINFIVDAERRIYRKRIRFEGNDVT---ADSTLRREMRRQEQAWLSTSAVSLAKSR

GTVKTKMEDDIIKLLGRYGYAYPRV-QSMPEINDA--DKTVKLRVNDAENRFYVRRIRFEGNDTS---KDAVLRREMRQMEAWLSDGLVDQGKER  
KSKLVQTVVEGIRKTLGSRGYAFATV-NPIPTVDKD--NHVSPKIVVDAERKRVYRNRINFEGNNVT---NDYVFRROQLQYEEOSYKNEAIDKSQR  
LDKLNLEVLAKVRELEQSAAGAAQV-TASPTTRRENGKHFVDEIQQVAAIENRIAMRHIDISGNKMT---RDEVIRRELQMEAVYDQAKINRVSER  
HKMKMQQLQNI NNVTNGGAFSDV-KVRISENTE--THTIDLNIDITPNRVYENRITTIIGNTRT---KDEVIRREIGIYESIYSSALNESIKKI  
GTAIQHNTDMQEWLQAGVHFAFAMV-RSEIARNPE--KRIVDILLFDVTEPHVYRERDINDGNIT---RDNVIRRNLPMAEDRPTPDKKYSKIA  
RSAVRLSIEKLDLVDGFVAFLDI-QPRIDYDDE--AKLVALHFEIHKGRVYVNRVDVGNTRT---RDSVIRRMVQVVEEDRPSSTKVRQTKK  
LCLKINSISRNIKELLGNVYAFADV-SILTKEKEL--DCLNTIFKVDIKVTKYVIRIIGNSRT---RDIVIRREMKLESSELYNKDKIKLSDKRI  
ADEVERTVDAFTRELGNRGFADVD-KPGVERNRE--KRTVDLTFNIRETPKVFYERDIRGNVRT---LDKVIIRREMDLVEEDRPNREKVAKSEQKI  
AREIQKSMEDIAQQRVSAKGVPFARV-VPRGNRDMG--NGTIVGTYMVDQGEYRVEREVKGNTRT---RDIYIRREDFISEDANQOEVITRAKRF  
AKQVEDTIDSLNEVAGTAVYAFADV-RPRYDRDKD--NLTMGLVTI IQEAPRYVYKEDINDGNLTL---QDKVIRREFRLEAEDANQOEVITRAKRF

**B. pertussis** FhaC (AAB30624.1)

NGGGR-TGNVTPADE-----YGYSLDLQLRRALPRVSIQMDNSGPGTPE-NGRYKNASVANDLIGLNDITL

Potra2 Barrel

TpsB (WP\_005764711.1) NITMK-TAKVAVASDQ-----KSIINITEQRSLYPDFSIQVNNSGTENNA-NGRNQATLNVSWSDLIGLNDIRW

TpsB (YP\_003741556.1) LKVSFK-TALVNAATEK-----PGYSVVDYSDLDVRYFSPFGIENNSGTEPQ---GDHQQYLATATGRNIIIGLNDISL

TpsB (YP\_006646915.1) NRMPQQQVSIQLAPGSG-----PGYSIIVLITSKKQIPLITANIGDMNSGQKST---GEWLGSGGLWADNVLIGLADQW

TpsB (WP\_004122309.1) NRLPSNNAKMELLPGTK-----PGTSCIVLIVDTPSKTRWASIGDMNSGQDST---GRNQYLFSPKDNVLIGLNDLL

TpsB (WP\_008291755.1) NRLPSNNAVMELLPGET-----PGMSVILIKNAPSRRYFLNITVDNLGTTTT---GEEQLGLNALENIIGLNELF

TpsB (WP\_005980414.1) NSVSSNNARLITPAGDE-----LGGSIIVLIDNHKTKKISGAIVNVDLQKST---GKDRIKFSLIFDDVIGLINDSF

TpsB (YP\_00307097.1) NRVSNNVVELIAPGQE-----AGSSILQENQQTTRTFNANISYNNYDDEST---GRDRGKIITPKDNLIGLINDSF

TpsB (YP\_335961.1) NCLGR-AAKIVVPAEE-----AGYSYLDVLRQSKPEAVASVDNSGLDRAGDGLYRYGVGDIVAVHLLIGLNDVL

TpsB (WP\_002831157.1) NNGAR-DVKVILKASEN-----YGYSDIILIKLNSKPPDLILDFDINSYKAK---GEYKASAYLSLNIIGLINDSI

TpsB (WP\_004649222.1) NKLQSNNASMMVTPGER-----TGESTIVFDNAPSRRWNGYFSDNKGQDST---GRNQAVLGVGIDNIFIGLINDLL

---

**E. coli** TamA (POADE4.1)

SATGWEIN-SVIVAPQFDKA-----RETKVLEPLTGVVSPRTEIETIGVGYST-DVG---PRVKATWKKPWNMSYIGLHSL

Potra3 Barrel

TamA (WP\_010374432.1) TKLLYES-TIIVQPKPEEA-----DDQGRVFIIVKLTAKRKTIVYTSGLSYGS-ESG---AGVRGGVERRYVNAHIGLHKM

TamA (YP\_006917734.1) QASNYER-SVIVNPHINQN-----DDQIVFPMIVDLSMASQTSFSGAVGFST-DQG---PRVRGQYQNRVFNWIGLHKY

TamA (YP\_005378779.1) TNTIYES-MVIVKPDMSH-----RQQQIVFIVLNLHPAKQIYITGPFYGT-DTG---PGIRAGLSKRWINRIGLHKW

TamA (WP\_006914415.1) SDITVYN-KIIVJAERQAEREAIPGDWLFDLIYPPDPLISIGRLQVFIIVATAEFPKQSYQISGGYGT-DTG---PRVGLGVFRHLNPKIGLHQF

TamA (WP\_006956461.1) TELSYES-TVIVNADWDQ-----AAKSQVFIIVDTTPNQRSHYRIGLGYGT-DTG---ARIAGFDRRWIIPNIGLHLP

TamA (WP\_007639592.1) NASNYEA-VASVSPDLQA-----LEDHQVFIIVDLEQRKRHAYSGAGIEA-DE---PRVLLGFEDRYVNRIGLHRF

TamA (WP\_006416500.1) LGSEYES-DVIVVPLTDQA-----GPNHEIFIVIAKRNLPNKYRIGLGYAT-DVG---PRLSMDWRRRYLNRRIGLHKL

TamA (YP\_007468392.1) IASNYAR-EVIVPPRYEE-----SLDQQLPLIIVIMKPIAPHKFTIGVGYDS-DTG---IRGSARWDRRLNRYGHHS

TamA (WP\_008316497.1) DASIYES-EVIVPTIDHA-----NRSVPLIIVKVPKRRVFSVIGLGYST-DIG---ARISGLGTWRYLNPKIGLHKM

TamA (YP\_006721763.1) TNTREYA-EVIVPPDREH-----AHDHQVFIIVTALKPGHTQRLQIGVGYGS-DTG---ARGSLTYRHLNVLIGLHEF

---

**H. ducreyi** BamA (4K3C\_A)

EHTCEE-TVIVRMSMPTVKNT-----DDQVILIVYIKTKERTGSIINIGVGYGS-GSG---LRYNAGITQDNFIIGLSSL

Potra5 Barrel

BamA (YP\_002998039.1) NRLQFEE-TVIVDTQRPVGS-----PDQVDVIVYKVKERTGSEFNEIGYGT-ESG---VSFOAGVQDQNWIGLIGLAV

BamA (YP\_001121414.1) EQLEIVYG-AADMELVPVAGS-----DDLVDVINYIKERNANSISGSLGFS-DLYG---FMIGRRLNMPNVEIGLGNTP

BamA (WP\_003783125.1) RQLQYES-DVIVQTNMVTVPEN-----EQQVDMVIVKERSTGSLNASIGWSQ-DDG---MVLAAQVSDNLEIGLIGKSA

BamA (YP\_001219350.1) KRLLFEE-EKIVQVSKLKDII-----EDKINLVFSVVEVQTGTGFSIGFSSHN-NTG---ASLNLGVQERNFLEIGLNTL

BamA (WP\_010501263.1) QDQLYES-TVIVDQVQGSAA-----PDRVNVAAVVEKPTGSEFISGGYST-DVG---VLGNASIKQHNMLIGLIGLDA

BamA (YP\_865762.1) QRLDFEE-KVIVETPQTQD-----PDQVNVIVKVEEKTGSEFISGAGFST-TDK---IVTSASISQKNFLEIGLQNL

BamA (YP\_00549313.1) EKLLFEE-NVIVDFKLVQFSSNS-----EDLIDIVIVSIEKPTGIANLSFGYGS-SEK---SLLSASISEDNIFIGLIGDLD

BamA (YP\_004865655.1) RDLQYES-NVIVTPQPGTA-----PDKSVVILEVAEKSTGELSIGAGFST-ADG---PLADFKIERNFLEIGLIGDLD

BamA (YP\_002549812.1) EALQYES-SVIVTTAQGSA-----PDRVIVVNVVEDQSTGSEFISGAGYVGGDGG---LILEASVVEEKNFLEIGLIGYI

BamA (WP\_008996841.1) KSLQYES-EKIVVQKPGSA-----EDRVILEANVEEKTGELQLSAGFSS-LES---FIFQASIRQRNFRIGLIGQTV

---

**B. pertussis** FhaC (AAB30624.1)

GLYIGNRYRDAG-----HDAERNYDIMSIVELG---RTRLDLQTYSTRNLKTRYGQY-QSAGNSRSF

Barrel

TpsB (WP\_005764711.1) NFSTGYRYFKHSR-----ANKQQNYSLIIVQVFA---FSTLDIKLSESAIEKELR-FGFTF-SSEGKTKTA

TpsB (YP\_003741556.1) SGRYSWYNMKDD-----KEHQYTAGSLNIIVYR---YWNLDLSYLSNYENYVGGTYGRY-HGEGTSRRL

TpsB (YP\_006646915.1) FVNGGHSSSEFRDS-----RNVESLQAGVSIIVYG---YWTLSYDYSQSYRNRDFINRDFLW-HSTGDSQTH

TpsB (WP\_008291755.1) NLIYNMADSDAWLT-----GEHQKSAITFNIGIIVVFLG---YWTFSGALSYDYRITVSSGGINY-SSYDITTTT

TpsB (WP\_005980414.1) SYTHRRTEGNGFG-----KQHSRNSLSVLSVPIH---YWFPSLHNWSDYATLALPGGEL-IASGDSNT

TpsB (WP\_00307097.1) ASTYQRKLGNNR-----KYKDNENFSPVIVAVPIK---YWFPSISKDQSEYLSLTFESPAHTY-EITGVSKNI

TpsB (YP\_335961.1) YASVQRGRNKRPLRNDYTGSSSPGPTIIVKDKDILLPADTEAPEKFNEDWSIMVIFFR---YWFPSGTYSHSYIISSESGYNGLY-DTSGRSTQF

TpsB (WP\_002831157.1) TLSAGRRYVQDPA-----HHAYDSLAVSIVWRVVG---RWSADLRYIAQPTKSLSLSGTYGDI-QLSGNTQDV

TpsB (WP\_004649222.1) RFGFIKGLLKDMS-----QERENVYVAVIIVPIIQ---SYQLSYSMSQYSDMINMIEIGYDYSFIKNTDTSLRH

TpsB (WP\_004649222.1) NLSYNRSLPPEAN-----RQDSFSSSTFIVAVFLG---YHTLSLNASRSEYDSTLQTPNQL-HSSGEMTNY

---

**E. coli** TamA (POADE4.1)

TTSTSTIS-----APEQTLDVFSVIVKMLLKNPLEQYVIVLQGGFKRTDLN-----DTESDSTTL

Barrel

TamA (WP\_010374432.1) DTQLDYA-----QNRKSLTTSVIVVAF-RWLDGWYATASARLYDEQTD-----YIDLNRNVKL

TamA (YP\_006917734.1) RLDALVS-----RDLQEMSGTIVIVRA-EAYREWYIISGGWIRESTS---SYESTATTT

TamA (YP\_005378779.1) SMELIILA-----QRLKLSLTLVIVVIMP-GPNQRSFNPFGANFLDANTV-----TSVAHTEFV

TamA (WP\_006914415.1) RSDLRLS-----AVQQAQASVIVIVIA-NVAEDKLSFTANVANEDFG-----DITSINYGI

TamA (WP\_006956461.1) KSQLQLS-----QFESRLTALVIVVIGP-RPQTDYSQFRSGLADKTTD-----SQESQLIKI

TamA (WP\_007639592.1) NADLAAS-----DIKKSQAIVIVIVIMR-RPAYEFLFRYTGYLEEETV-----TSLSEKTYI

TamA (WP\_006416500.1) RTELSLIA-----PALSNLELIRVIVVLIQ-DPTRDYIIVIKPQSTYTDTA-----TRKGVHVS

TamA (YP\_007468392.1) ELSVVKLA-----WTESIIRACVIVVIVV-KPLTDRWVSTASYEFDQTP-----DTSATLEM

TamA (WP\_008316497.1) TVDLLLL-----QKQRRAVVIVVIVVIGK-RPATSFYDFYVRYDYEDTK-----YRDYTAFLI

TamA (YP\_006721763.1) QSQYLIS-----ERLQGLAANVIVVIVVISP-RDRTRYSALQLNLQKEDVS-----TYISRLAAL

---

**H. ducreyi** BamA (4K3C\_A)

GLNGSRN-----TDSTNVNLSIVIVVIFVYF-TKDGVSLLGNIIVYEDYDINSARKASA---AYKRKYGA

Barrel

BamA (YP\_002998039.1) GINGTKN-----DYQTYAELSVTVIVVYF-TVDGVSLGRLFYNDQADDADLS---DYTNKSYGT

BamA (YP\_001121414.1) NLNAQLS-----IPFQQLDISVIVVIVVIFVYF-TTSGVSSQISAYIN-RSNFAKTNAVA---AYQLDTIGA

BamA (WP\_003783125.1) SLLNSRS-----KVRQSGNLSVIVVIVVIFVYF-TTDGVMSTYNLFGSNYSYKLDNNPR---NYGMRRLGA

BamA (YP\_001219350.1) SLSLSRS-----KATRDVSFYSVIVVIVVIFVYF-TQNKHSISYGLFSKKLDAELED---EYKIDENG

BamA (WP\_010501263.1) GIGSTVA-----YVEKQADISVIVVIVVIFVYF-LNRNLVAGADFYFIQNNYQYQ---SYKESQYGM

BamA (YP\_865762.1) SASAALS-----ASTADFDISVIVVIVVIFVYF-LGKPIVIVVIFVYF-SAGIDLYNRKVEDSSTS---SYDRSYTGM

BamA (YP\_007459313.1) SLQLNKS-----KAGNNIVISVIVVIVVIFVYF-TKNAISNVLSYKSNVFNPNNG---NYKLRSMGI

BamA (YP\_004865655.1) LLGATIA-----GERTEFDFAVIVVIVVIFVYF-LDRDFASAGVNAFHITRDLQDES---SYDQKRTGG

BamA (YP\_002549812.1) RIAAGAGT-----DSDQYVLSVIVVIVVIFVYF-LGRIYAVGFDLFRKSTSSND---YYDYNEQGG

BamA (WP\_008996841.1) GIGSISIS-----QYSKSVESGVIVVIVVIFVYF-LFNKNMSLGVLDLYRRDYNNAYNSDNK---TYEQATTGM

**B. pertussis FhaC (AAB30624.1)**

GLKATRLLYLDTRSRQFSVYGGKLRQNKNYLAG-----TRLDVSSKHYSQDVTVMQOYSTQRG-----ANAYFGDLSP  
 Barrel

TpsB (WP\_005764711.1) NIKLNVLLRDKDTLLVYGELEFKKRI SYFSD-----I L L I G N Y H N N K F L G S V Y V T F G-----Y G K L Y D L S Y  
 TpsB (WP\_003741556.1) SAKVSRLLGIRDASGKFSAWAKVEKRYSTNFIE-----Y K I A V S S K N Y S N V S T G I N Y V G N V L-----D G W F Y G D L S V  
 TpsB (WP\_006646915.1) RATLSRFVFRNDKMTSLSAGLSHRIGKNYLND-----V L L Q I S S R K L S S A I G I N H S Q K L W-----G G L A T I N P A Y  
 TpsB (WP\_004122309.1) T L S A D R V L H R D A N S K T A L T L S H V L R D T Q N Y F N G-----A R L A S T S O V L S S L G A S L N H S H R I L-----G G Y A S C Q I G Y  
 TpsB (WP\_008291755.1) S F I A D Y L A Y R D A I N R V S I S A A T A K S T D N F L A G-----Q L L E V S S R R L S F D L G A S W S T R F L-----G G A L T I Q I N H  
 TpsB (WP\_005980414.1) N Y S A R R I I N R N S D G K T S V G V T L N K E T K N Y F D G-----I K L I T S S R K L S I L K A D I S H R N R L Y-----N G V F Y G S L T Y  
 TpsB (WP\_00307907.1) N L N A D R V Y N R N K M S I S I N G G L K L T Q N Y F E D-----V Q L V D R R L T I G S L G I N Y S R G F F-----G G I L G F D V S Y  
 TpsB (WP\_335961.1) N L R V S R V L R R W R T G T D A V V A I D R K R V R N Y I D D-----T L I E I N S N T H T S V T A G V N R L D S L F-----G G V F A D G G W  
 TpsB (WP\_002831157.1) K I M L K K I L H R T S K D K F S I V A N L G I K D D V N E I D N-----F R L E S S S G R Y S S A S G V E Y S T L A F-----G G F L F I N L E Y  
 TpsB (WP\_004649222.1) T G R V D S L Y R G F N N Q L R A N I G L T H K D T A A F L E D-----I K L D V S S R K L S V L D I G L S Y S D M L L-----A G V V N A N A G Y

**E. coli TamA (POAE4.1)**

VASRYWDLSS-----GWRAINLRWLDHFTQG-----EITNTTMLFYPGVMISRTSRGGLMP-----TWGDSQRYSI  
 Barrel

Tama (WP\_010374432.1) TGSRSQINE---RWSAIASINALRERWRFS-----S G D D F E G A V E T S T L I Y P Q L Q A N Y I N V D R L F P-----R S V S G Q M F I  
 Tama (WP\_006917734.1) R R V A V E A F A G-----D W I L N T G V N L R R E S Y V I G-----S E P A D E K W L I V P G A G F S W V D S E T A V R Q-----T Y G L R F E A E L  
 Tama (WP\_005378779.1) V A N E T R L W H-----G W T R T L G V H A L T G T F T V G-----K R G T E S D R I A G L E H G S S T L Y A E G S L A R K R M D N S T F Y-----R R G W S L N E F T A  
 Tama (WP\_006914415.1) G A V R D T G-----W S L G R K R A Y I N L E R E T Y-----D L G D D V G D R T A T L Y P G Y T I T L Q K A D D L L N T-----R K G V S A S L D V  
 Tama (WP\_006956461.1) G A A E I R A F N-----H W Q Y D I G A F W L N E D F E I G-----E Q R G N A Q L L V P T V E W R F L S A D E R I N I-----N R G W R A N F S I Y  
 Tama (WP\_007639592.1) G S S Y S Y H D N-----K W L Q Y A L D Y I Q E E S T I G-----R M L P Q R S D L I I P S W S V L R T K T D G S P Y P-----L S W S A L G R I Y  
 Tama (WP\_006416500.1) Q A A H S T L T P R-----G W R R N L G D Y R E D L E L A-----S D S S D A L G A T S E L V P T L S W S K T V S D D P I N T-----N R G V R I K Y T L  
 Tama (WP\_007468392.1) E T A F V R R N L A-----D T L L Y K G F V L A S S E Q F S V-----E G E P D E N T A L Y S L G G T F R F S D T E S I F P-----Q Y G Y L F L I D L  
 Tama (WP\_008316497.1) G A S T H Q K D-----N L K Q V Y A L D Y R-----N D R F-----R T P D G V R R H T K M I V P S A T F T W Q N I E N P W F T-----A W L L G S V M V  
 Tama (WP\_006721763.1) E G S V N R S-----M G R G K L G T V F L R V H Q E G F-----T I A G E D S S L L L V P G I R Y S E H R F D N L V R P-----T R G Y R F M V E G

**H. ducreyi BamA (4K3C\_A)**

SGLTGLPFVDE---NNSYVLGLGYTHDKLRNVEREYREKRYVNSMK-FP INPON-SHYDRIQSDAFLDFGWNYNLNRGYPF---TAGSSANISG  
 Barrel

BamA (WP\_002998039.1) D V T L G P P I N E-----Y N S L R A G L G Y V H N S L S N M-----Q P Q V A M W R Y L S M G E H P S T S D Q D N S F K T D D F T N Y G W Y N K L D R G Y F P-----T D G S R V N L T G  
 BamA (WP\_001121414.1) R L M Y G V P I S T-----F S N V S G G I T F A N N T V K Q S-----D G Y Q S S I V Q W F I Q Q Q G R N N F N E P A L T A G W S Y D N S N K Y I F A-----T D G S F N L G  
 BamA (WP\_003783125.1) T A M M G I P V T E-----Y D R I N V G L G V E N M R V K L R-----N N P P Y R Y Q H F V D T H G A S N W L Y K G M S W R N T T D D S Y W P-----T R G Y Q A N V T G  
 BamA (WP\_001219350.1) S L R G S V P I T K-----A T R I G A N L R A S K R Y I T C G-----L T F S D N D H E P T C A K K D K E L K L G L N W S N N T L N D F N P F-----T K G Q Q S N L F  
 BamA (WP\_010501263.1) B L I L G Y A I T E-----Y L S Q S F S Y T L V D R Q V G N F-----Y D A A A I A K D P D L M Q W A P S I Y V Q S A G W S V L S Q L S T S L T Y D R R D R R M N P-----H E G Y M M V G G  
 BamA (WP\_865762.1) G L R L G A P L S D-----E L Y N S V Y N L R H V E I H N V-----D S T A S T Y I Q A Q Y A N S P Y L Q S M L S Y N L W N M L Q Q E E T G L V G R H S H V T T  
 BamA (WP\_001459313.1) G A N F (Y P L I S D-----I N K V F L G S S F E N N K I I L Y-----K K S S I Y H R E V N D Y G N R T A I I F N S G W S Q D T R D S I L T P-----S C M Y T K L L F  
 BamA (WP\_004865655.1) V G E F G Y P L S E-----K W R Q S L R Y R I E Q N E I T E V-----Q D D A S Y I K E Q A G E R S T A I G Q M L T Y D S R N S T L F P-----S D G Y G W L D T  
 BamA (WP\_002549812.1) T L R V T A P I T E-----D I A T T F R Y T Y K I K Y K G V-----D D W T T S L S Q Y Q D L I N G S F W V S S V S Q T L Y N L D D K N L P-----H E G I Y A T F T H  
 BamA (WP\_008996841.1) Q V R L G V P L T E-----Y L T I F R Y T L N Y D E V S L D K D T Y Y S T R V N G T S Q C D P I A G T Y L C E A I G K R L S I V G S S L I Y D K L D N R M R P-----T R G F T A T L S G

**B. pertussis FhaC (AAB30624.1)**

TRGVGVNNKGYA--AYDERGPQGNVSRFNGLAWTRYMA--LAGQPIQWASQLGFOYSR----QQLNSYQITVDEYTVGGVNLRTSQ-----  
 Barrel

TpsB (WP\_005764711.1) T N G L R W F N A N Y S-----A F D S N-----R E K T L K L L S G S V N W S R Q I S-----I S E R V A N Y Q L R V G A Q Y G F-----D S I Y S E N Q S I D E Y T V G G V N L R T S Q-----  
 TpsB (WP\_003741556.1) V A G T P F W N A S W T D-----D P D L K G Y D I Q Y V G Y M T W K N I A S-----I K R I G L Q Y E G T T F F Q Y T N-----D T V S S E Q I T V D E Y S V G E K N D-----Y I-----  
 TpsB (WP\_006646915.1) S R G T R W F G A E S D E-----G K S D D A F R A E N K V T L A A S Y Y P I A-----D N L H Y L T N L Y G Q Y S P-----Q R L Y G S E Q V T I G E T S V S E K E D-----Y I-----  
 TpsB (WP\_004122309.1) S H I P I L G A R K D K-----N P E R D E F R A E S K F T A Y S G F F R P F Q-----L G Q A N F S W N T Q L S G W A P-----H T L Y S S E R I S I S R Y T V G E R H D-----S L-----  
 TpsB (WP\_008291755.1) I W G I K A F N A L E D A E N L F D E A P R A E G K W T S N I Y W T K P F Q-----V G N K A V F S S S F S Q G H V-----D V L Y S E S I S I G D T S V S G R A D T-----S M-----  
 TpsB (WP\_005980414.1) H E G I K K F G A E R D E-----N K G D Y S P R A E G K Y T A D L S W Y K P F M-----I K E Q R F S Y R V S F S G Q Y S D-----D I L Y S E K L G I D D T Y I G E K E N-----S I-----  
 TpsB (WP\_00307907.1) D R G L P W F S A D D H-----E K E I Y P D K G R E K Y G L N I N W Y K P M T-----I G K Q R F Y R L V G V G Y T Q-----D V L Y S E K I S I G D T Y I G E K G D-----S I-----  
 TpsB (WP\_335961.1) T R G V G W L G A S E D P-----V S A G Q G L S R E D K F N L N L W S R D F T-----A G S L R A R Y A A M G A Q Y S K-----D D L Y Y D S K V I D D Y T I G E K I R-----S A-----  
 TpsB (WP\_002831157.1) E K G I P F L G S K D S-----K D S L Y K T E N R V N F N L S Y K S F Y A-----N D G L A F L Y Q N S L G A S Y S N-----E P L L Y A D K E I I D E Y T V G E K E S-----S A-----  
 TpsB (WP\_004649222.1) S R G L K I F N A L E D A E N L S A E M P K A E E K L Y T G L S Y F K P F Q-----A L R Q N F S F S S N F A Q Y A L-----D T L Y G S E Q S I S L Y S V E N Q S-----S L-----

**E. coli TamA (POAE4.1)**

DYSNTAWGSD-----VDSVPQAQNVWIRTLY-----DRHRFVTRGTLGWIET---GDFDKVPPDLREFAEDRSILVGYKYSIAPKYA---  
 Barrel

Tama (WP\_010374432.1) R G G A E G A G S D-----T N G S V Q Y Q L R W F L G A G-----D N S R L I L R G E G T T W T-----S D L V A M P P S L R E F A G A N S I T G Y A P R E V G P R T P---  
 Tama (WP\_006917734.1) T G S S Q Y W L S D-----V D M L Q L R L K G K V I P L G-----E K G R L L T R A E V A G T L K-----D D F S E L P P S V R E F A G D N S V G W A Y Q S I G E N A-----  
 Tama (WP\_005378779.1) R T T A G S A L S S-----A R E S Q L M A D A K W I R A F A-----G R N R L I L R G S A A L T D T-----N D F D A L P P Q L R E F A G D R S V G W A Y Q A I G P L N-----  
 Tama (WP\_006914415.1) H G G S E S L A S E-----V D V Q A K L T G N A V L P L T-----S K S R L L R S Q F G A I E V-----D D F D E L P P S Q R E F A G D R T V G Y Q Q I S P E N-----  
 Tama (WP\_006956461.1) Q T A S R D L S E-----A D L I R G R F E L S V V P L L-----D S W R L L A R A E V G A M Y T-----D S F E A I P P S L R E F A G D Q S V G W A Y E Q I G P E D-----  
 Tama (WP\_007639592.1) S G S F K S I G S D-----F S E A Q F Y G R A K Y V K G F A-----Y G R I L A R T E L G I T E T-----D N V D Q L P A S V R E F A G D S S V G W Y K S I G P T R N I Y G  
 Tama (WP\_006416500.1) L G A V Q G L S E-----A S M S G Q I Q F K W V R F A-----E R Y R V I T R T D L G A T L A-----D S V D D L P A S R R E F A G D N S I G W G P D A I G P N D-----  
 Tama (WP\_007468392.1) R G A S E A L L S D-----T S A R L H M K G R Y M V L G-----K N G R I D T Q T E I G T T W V-----E D F D M Y P A T L R E F A G D T S V G W S Y E S I G P K N-----  
 Tama (WP\_008316497.1) R G A A K I A S D-----V N E I Q A K A E G T A V I P I P G F-----Q N D R I I L R Q I G H T F V P S E D L Y N M P P A L L E F A G D N S V G W Y R Y N I G E K G-----  
 Tama (WP\_006721763.1) S G T H Q Y L G S D-----T G L I Q V R A E G S T I V P L G-----W R L S L S R V A G G L T F L-----N D P L A E L P A S L R E F A G D R S V G W Y S Y S I G P R N-----

**H. ducreyi BamA (4K3C\_A)**

KLT---IPGSD-----NKTYQVGTNFSGYPIINSE---HKWVIATKGGLAYTNS--PGGKEVPFYQIISAGMGSISAGSGISIPKAIYYR  
 Barrel

BamA (WP\_002998039.1) K V T-----I P G S D-----N E Y V K V T L D T A T Y V P I D D D-----H K W V V L G R T R W G Y G D G-----L G G K E M P F Y E N E V A G S S T V G E Q S N T I G P K A V Y F P  
 BamA (WP\_001121414.1) S V N-----I P V I S-----N I N A Y K I E V G G T Y N I A V P N T-----D M S A L T I R A G V Q Y G G G Y-----G K T Q L P P Y E N V G G S G S V G L G S G I P R D I N L V  
 BamA (WP\_003783125.1) E I A-----I P G S D-----I K Y V Q L G Q H Q T Y F P L S K S-----F T L M L N G Q I G I S N H Y-----G S T S E V P F M Y N O T G L G S V G E S G S I G P K Y Y I D  
 BamA (WP\_001219350.1) S L T-----I P T A D-----F R Y K L D A S H K S Y Y P L K N D-----I T F S L R N L G F A Q G Y-----D G K E P F F F K R Y G G S S V G E D P N S I G P K Y L N-----  
 BamA (WP\_010501263.1) D F A-----G L G G D-----A K Y R V K A D G A Y I P L D R I M G N H D W T V Q P K G G V G M G D W-----S S S G R R N I I D N V G E N I L Q L G G V P R S G H I C  
 BamA (WP\_865762.1) D L S-----G L G G D-----V K E V R S S D N H I Y S I R P M-----G K L V A H R L R K G G V V E S-----W D G D V P I Y E K Q I G P Q S V G E K N S G I G P R A I V-----  
 BamA (WP\_007459313.1) D L S-----T Y-----N L R M N F S A Q H Q H Y F K I D-----N I V L A I N G M F D Y G F S Y-----S N K Y P A I K N I Y A I G I G I Y P S S V G P K D L K-----  
 BamA (WP\_004865655.1) E M S-----G L G G D-----S Q M S A K L G A S H F Y P L F D T-----D R V I N V L G E V G A I H G Y-----G D E N V A I N E R E F I G G T I E R P A G V G P R D I G-----  
 BamA (WP\_002549812.1) E F A-----G L G G D-----S E Y M K Y G K A R I F K S L S D E-----Q D I I G S L S F G A G H V M A T-----G D N I N V F D Q O I G K-----G I E R N N G I G V R M P N-----  
 BamA (WP\_008996841.1) D V A-----G L G G D-----V K M A R V S V K A T Q Y F N L G K-----G F I F S L S E G G A I T G W-----G G Q D V R L T D R E F I E P-----G I A I R I G I P R V I R K N

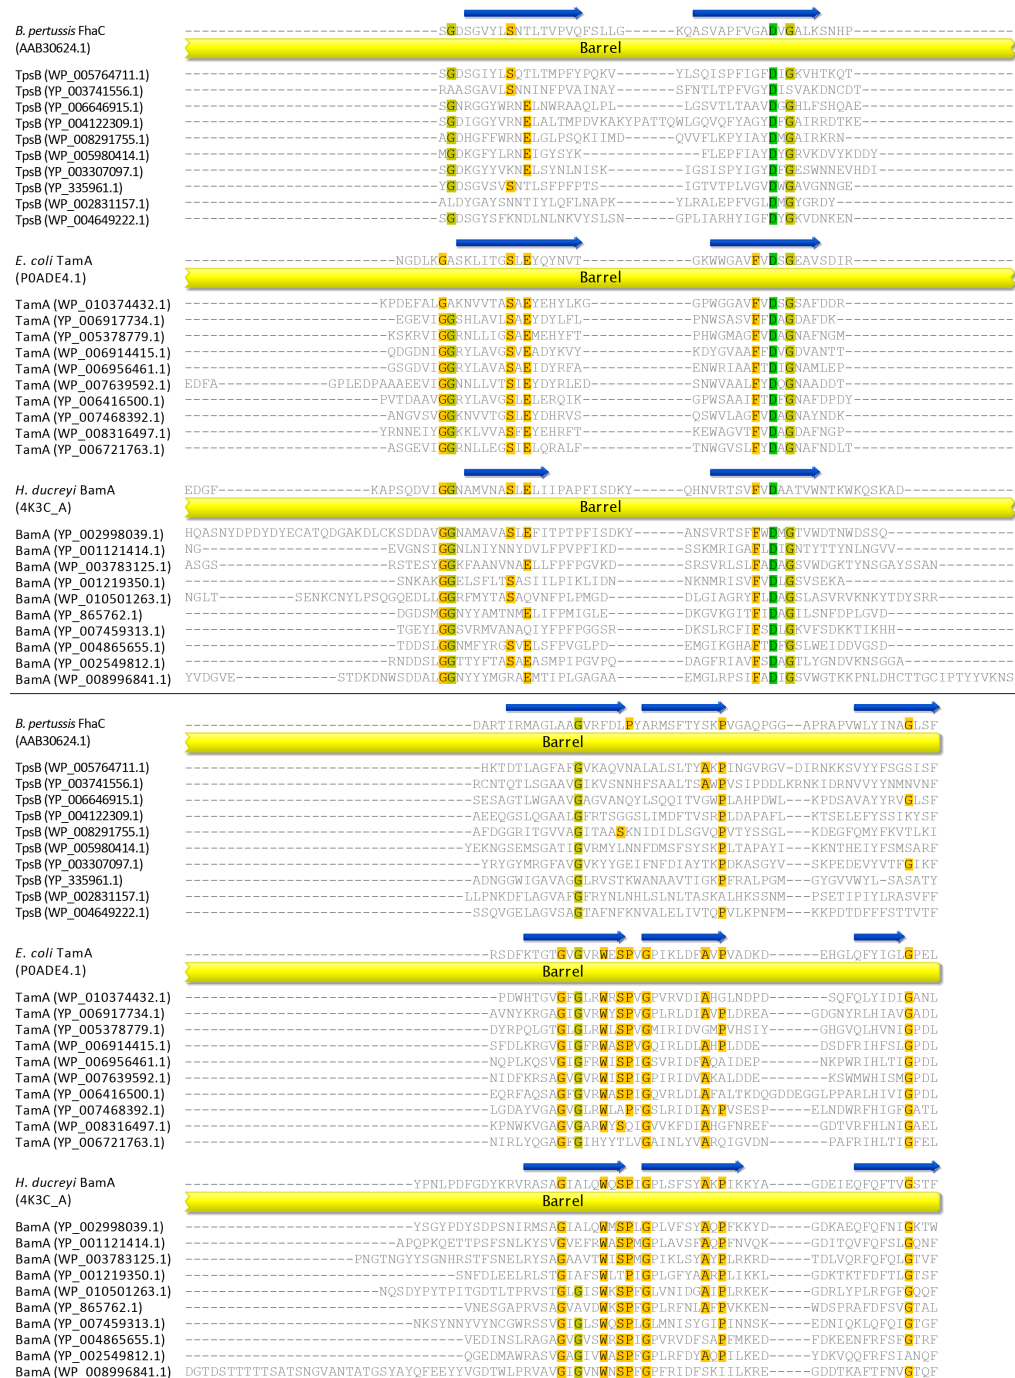

**Supplementary Figure 3. Alignment of Omp85 sequences.** 11 TpsB, 11 TamA and 11 Bama sequences beginning with the second last POTRA domains. For the known structures of *B. pertussis* FhaC (PDB entry 4QKY; this work), *E. coli* TamA (PDB entry 4C00<sup>2</sup>) and *H. ducreyi* Bama (PDB entry 4K3C<sup>3</sup>),  $\alpha$ -helices and  $\beta$ -strands are indicated by red tubes and blue arrows, respectively, on top of the sequences. The sequences for the N-terminal helices and linkers of TpsB proteins are shown unaligned. Cysteines in the linker region and POTRA1 domain of TpsB proteins, plausibly forming disulfide bonds (see text), are highlighted in red.

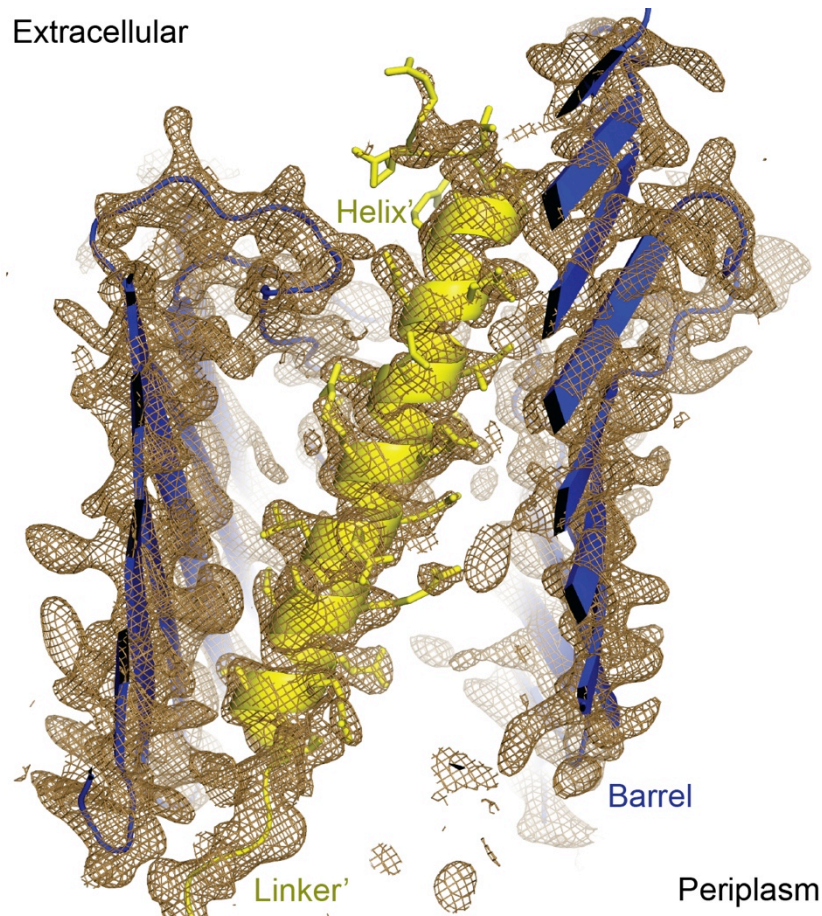

**Supplementary Figure 4. Electron density around helix and barrel of FhaC<sub>DIS</sub>.** The 2FoFc map for FhaC<sub>DIS</sub> is shown in a radius of 2.5 Å around atoms belonging to helix and linker (yellow) and the barrel (blue) at 1σ contour level.



## Supplementary Tables

**Supplementary Table 1** Differences between FhaC structural models

| Region           | FhaC <sub>DIS</sub> , residues | wtFhaC <sub>old</sub> , corresponding residues | Variation                                                                                           |
|------------------|--------------------------------|------------------------------------------------|-----------------------------------------------------------------------------------------------------|
| N-terminal helix | Gln3-Asp10                     | Gln3-Gly7                                      | Residues from symmetry-related molecules in different conformations                                 |
| N-terminal helix | Leu11-Arg33                    | Ala8-Ala30                                     | Residues from symmetry-related molecules aligned with offset 3                                      |
| Linker           | Pro34-His57                    | Leu31-Asp52                                    | Not built in superseded wtFhaC <sub>old</sub> model, well resolved in FhaC <sub>DIS</sub> structure |
| POTRA1           | Thr58-Thr60                    | Ala53-Ser55                                    | Aligned with offset 5                                                                               |
| POTRA1           | Val61                          | Gly56-Val61                                    | Extra loop in wtFhaC <sub>old</sub> model                                                           |
| POTRA1           | Val70-Glu71                    | Val70-Gly72                                    | Different conformations                                                                             |
| POTRA1           | Gly72-Pro77                    | Arg73-Ala78                                    | Aligned with offset -1                                                                              |
| POTRA1           | Ala78-Asp83                    | Pro79-Asp83                                    | Different conformations                                                                             |
| Barrel L1        | Pro222-G228                    | Pro222-G228                                    | Different conformations                                                                             |
| Barrel L3        | Leu294-Lys295                  | Leu294-Lys295                                  | Different conformations                                                                             |
| Barrel L3        | Thr296-Arg297                  | The296-Arg297                                  | Not built in FhaC <sub>DIS</sub> model                                                              |
| Barrel L4        | Gly343-Leu346                  | Gly343-Leu346                                  | Different conformations                                                                             |
| Barrel L5        | Val381-Val383                  | Val381-Val383                                  | Not built in FhaC <sub>DIS</sub> model                                                              |
| Barrel L5        | Gly398-Asn399                  | Gly398-Asn399                                  | Not built in FhaC <sub>DIS</sub> model                                                              |
| Barrel L6        | Arg432                         |                                                | Position skipped in wtFhaC <sub>old</sub> model                                                     |
| Barrel L6        | Gln433-Asn437                  | Arg432-Leu436                                  | Aligned with offset 1                                                                               |
| Barrel L6        | Ser438                         |                                                | Position skipped in wtFhaC <sub>old</sub> model                                                     |
| Barrel L6        | Tyr439-Glu446                  | Asn437-Gly444                                  | Aligned with offset 2                                                                               |
| Barrel L6        | Tyr447                         | Asp445-Thr456                                  | Extra loop in wtFhaC <sub>old</sub> model                                                           |
| Barrel L6        | Thr448-Gly451                  | Ser457-Gly460                                  | Aligned with offset -9                                                                              |
| Barrel L6        | Tyr452-Thr456                  | Asp461-Val464                                  | Different conformations                                                                             |
| Barrel L6, S12   | Ser457-Gln475                  | Tyr465-Ala483                                  | Aligned with offset -8                                                                              |
| Barrel T6        | Phe476-Ser477                  |                                                | Positions skipped in wtFhaC <sub>old</sub> model                                                    |
| Barrel T6        | Leu478-Lys481                  |                                                | Not built in FhaC <sub>DIS</sub> model, positions skipped in wtFhaC <sub>old</sub> model            |
| Barrel T6        | Gln482-Ala483                  |                                                | Positions skipped in wtFhaC <sub>old</sub> model                                                    |
| Barrel L7        | Asn499-Ala503                  | Asn499-Ala503                                  | Not built in FhaC <sub>DIS</sub> model                                                              |
| Barrel T7        | Leu519-Pro520                  | Leu519-Pro520                                  | Different conformations                                                                             |
| Barrel L8        | Gly533-Pro536                  | Gly533-Pro536                                  | Different conformations                                                                             |
| Barrel L8        | Gly537-Gly538                  | Gly537-Gly538                                  | Not built in FhaC <sub>DIS</sub> model                                                              |
| Barrel L8        | Ala539-Ala542                  | Ala539-Ala542                                  | Different conformations                                                                             |

Comparison of differences between the superseded wtFhaC<sub>old</sub> structure (PDB entry 2QDZ<sup>1</sup>) and FhaC<sub>DIS</sub> (PDB entry 4QL0; this work). Strands are indicated by “S”, extracellular loops by “L” , periplasmic turns by “T”.

## Supplementary References

1. Clantin B, *et al.* Structure of the membrane protein FhaC: A member of the Omp85-TpsB transporter superfamily. *Science* **317**, 957-961 (2007).
2. Gruss F, Zähringer F, Jakob RP, Burmann BM, Hiller S, Maier T. The structural basis of autotransporter translocation by TamA. *Nat Struct Mol Biol* **20**, 1318-1320 (2013).
3. Noinaj N, *et al.* Structural insight into the biogenesis of  $\beta$ -barrel membrane proteins. *Nature* **501**, 385-390 (2013).
